# Supplementary material for: Ionic liquid and lysine co-assisted synthesis of the highly dispersed Ni/SAPO-11 catalyst
Source: Royal Society of Chemistry journal article supplement (doi:10.1039/d2qi00941b), 2022-01-01
Supplement: d2qi00941b1.pdf [file d2qi00941b1.pdf]

## Supplementary data

### Ionic liquid and lysine co-assisted synthesis of the highly dispersed Ni/SAPO-11 catalyst

Lei Fan <sup>a</sup>, Lianming Zhao <sup>b</sup>, Yuchao Lv <sup>a</sup>, Tinghu Wang <sup>a</sup>, Yupeng Tian <sup>a</sup>, Jianye Fu <sup>a</sup>, Xinmei Liu <sup>a\*</sup>

<sup>a</sup> *State Key Laboratory of Heavy Oil Processing, China University of Petroleum, Qingdao, 266580, China*

<sup>b</sup> *College of Materials Science and Engineering, China University of Petroleum, Qingdao 266580, China*

---

\* Corresponding author at State Key Laboratory of Heavy Oil Processing, China University of Petroleum, Qingdao 266580, China, E-mail address: [lxmei@upc.edu.cn](mailto:lxmei@upc.edu.cn)

Table S1. Textural parameters of SAPO-11, 4%Ni/SAPO-11, 4%Ni/SAPO-11-L, 4%Ni/SAPO-11-LZ

| Sample           | BET ( $\text{m}^2\text{g}^{-1}$ ) | $S_{\text{Micro}}$ ( $\text{m}^2\text{g}^{-1}$ ) | $V_{\text{Total}}$ ( $\text{cm}^3\text{g}^{-1}$ ) | $V_{\text{Micro}}$ ( $\text{cm}^3\text{g}^{-1}$ ) |
|------------------|-----------------------------------|--------------------------------------------------|---------------------------------------------------|---------------------------------------------------|
| SAPO-11          | 202                               | 140                                              | 0.135                                             | 0.073                                             |
| 4%Ni/SAPO-11     | 119                               | 95                                               | 0.086                                             | 0.05                                              |
| 4%Ni/SAPO-11-L   | 142                               | 116                                              | 0.1                                               | 0.061                                             |
| 4%Ni/SAPO-11-LZ  | 125                               | 101                                              | 0.118                                             | 0.053                                             |
| 4%Ni/SAPO-11-LLZ | 155                               | 125                                              | 0.12                                              | 0.066                                             |

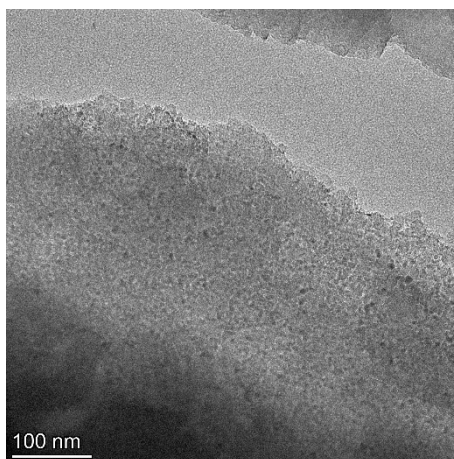

**Fig. S1.** TEM image of the 4%Ni/SAPO-11-L catalyst after calcination.

Table S2. The amount of Brønsted acid sites and Lewis acid sites of SAPO-11, 4%Ni/SAPO-11,

4%Ni/SAPO-11-L, 4%Ni/SAPO-11-LZ

| Sample            | Acidity (mmol/g) |      |      |
|-------------------|------------------|------|------|
|                   | L                | B    | B+L  |
| SAPO-11           | 1.04             | 1.73 | 2.77 |
| 4% Ni/SAPO-11     | 0.32             | 1.33 | 1.65 |
| 4% Ni/SAPO-11-L   | 0.36             | 1.58 | 1.94 |
| 4% Ni/SAPO-11-LZ  | 0.21             | 1.38 | 1.59 |
| 4% Ni/SAPO-11-LLZ | 0.11             | 1.35 | 1.46 |

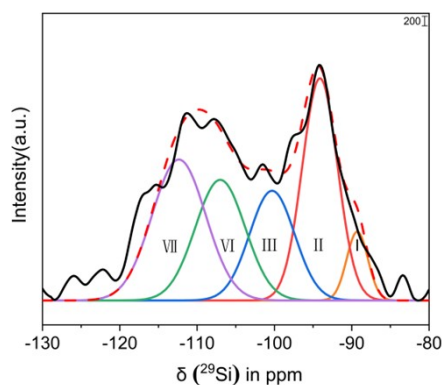

**Fig. S2.** Solid state  $^{29}\text{Si}$  MAS NMR spectra for SAPO-11.

**Table S3.** Deconvolution analysis results of  $^{29}\text{Si}$  MAS-NMR spectra of SAPO-11, 4%Ni/SAPO-11, 4% Ni/SAPO-11-L, 4%Ni/SAPO-11-LZ and 4%Ni/SAPO-11-LLZ

| Catalyst         | Relative content | SA dominant      |                  |                  |                  |
|------------------|------------------|------------------|------------------|------------------|------------------|
|                  |                  | Relative content | Relative content | Relative content | Relative content |
|                  | Si (4Al 0Si) (%) | Si (3Al 1Si) (%) | Si (2Al 2Si) (%) | Si (1Al 3Si) (%) | Si (0Al 4Si) (%) |
| SAPO-11          | 5.2              | 30.7             | 17.7             | 21.6             | 24.8             |
| 4%Ni/SAPO-11     | 4.4              | 39.1             | 11.9             | 15.6             | 29               |
| 4%Ni/SAPO-11-L   | 13.7             | 16.8             | 15.4             | 19.5             | 34.6             |
| 4%Ni/SAPO-11-LZ  | 4.7              | 36.6             | 10.3             | 18.4             | 30               |
| 4%Ni/SAPO-11-LLZ | 7.2              | 31.1             | 20.6             | 14.3             | 26.8             |

**Table S4.** Acid distribution of SAPO-11, 4% Ni/SAPO-11, 4% Ni/SAPO-11-L, 4%Ni/SAPO-11-LZ and 4%Ni/SAPO-11-LLZ

| Sample            | Acidity( $\mu\text{mol/g}$ ) |        |        | Total acid |
|-------------------|------------------------------|--------|--------|------------|
|                   | Weak                         | Medium | Strong |            |
| SAPO-11           | 55                           | 119    | 118    | 292        |
| 4% Ni/SAPO-11     | 50                           | 77     | 107    | 234        |
| 4% Ni/SAPO-11-L   | 46                           | 87     | 140    | 273        |
| 4% Ni/SAPO-11-LZ  | 39                           | 80     | 102    | 221        |
| 4% Ni/SAPO-11-LLZ | 34                           | 82     | 100    | 216        |
